1           Preclinical zebrafish model for organophosphorus  
2           intoxication: neuronal hyperexcitation, behavioral  
3           abnormalities and subsequent brain damages

4   *Alexandre Brenet<sup>1</sup>, Julie Somkhit<sup>1</sup>, Rahma Hassan-Abdi<sup>1</sup>, Constantin Yanicostas<sup>1</sup>, Alexandre Iger<sup>2</sup>,*  
5   *Dominique Saurat<sup>3</sup>, Nicolas Taudon<sup>3</sup>, Roxane Loyant<sup>4</sup>, Mathieu Porceddu<sup>4</sup>, Gregory Dal-Bo<sup>2</sup>,*  
6   *Florian Nachon<sup>2</sup>, Nina Dupuis<sup>2#</sup>, and Nadia Soussi-Yanicostas<sup>1##\*</sup>*

7   <sup>1</sup> Université de Paris, NeuroDiderot, Inserm, F-75019 Paris, France

8   <sup>2</sup> Institut de Recherche Biomédicale des Armées (IRBA), Département de toxicologie et risques  
9   chimiques, F-91 220 Brétigny-sur-Orge, France.

10   <sup>3</sup> Institut de Recherche Biomédicale des Armées (IRBA), Unité de développements analytiques et  
11   bioanalyse, F-91 220 Brétigny-sur-Orge, France.

12   <sup>4</sup> Mitologics SAS, Faculté de Médecine, 94000 Créteil, France

13   # These authors contributed equally to this work.

14   \* Corresponding authors:

15   Dr Nadia Soussi-Yanicostas  
16   Neurodiderot  
17   INSERM U1141  
18   48 boulevard Serurier  
19   75019 Paris  
20   France  
21   e-mail : [nadia.soussi@inserm.fr](mailto:nadia.soussi@inserm.fr)  
22   phone : +33 (0)1 40 03 19 31  
23

24 **ABSTRACT**

25 As key compounds for modern cultivation practices, organophosphorus (OP)-containing pesticides  
26 have become an important public health and environmental issues, worldwide, causing millions  
27 human intoxications each year. OP poisoning induces cholinergic syndrome, associating  
28 irreversible brain damages with epileptic seizures, possibly ending in life-threatening status  
29 epilepticus. Existing countermeasures are life-saving, but insufficiently effective to prevent long  
30 lasting neuronal consequences, emphasizing the dire need for animal models mimicking OP  
31 poisoning as tools to identify novel anti-OP countermeasures. Here, we used  
32 diisopropylfluorophosphate (DFP), a prototypic and moderately toxic OP compound, to generate a  
33 zebrafish OP intoxication model and study the consequences of DFP exposure on neuronal activity,  
34 larvae behaviour and neuron network organization. DFP poisoning caused marked  
35 acetylcholinesterase (AChE) inhibition, resulting in paralysis, decreased oxygen consumption,  
36 overexpression of c-Fos neuron activity marker, increased neuron apoptosis and epileptiform  
37 seizure-like activity, which was partially alleviated by diazepam treatment. DFP-exposed larvae  
38 also showed altered neuron networks with increased accumulation of NR2B-NMDA receptor  
39 combined with decreased GAD65/67 and gephyrin protein accumulation. Thus, we described a  
40 zebrafish model of DFP poisoning, which should (i) provide important insights into the  
41 pathophysiological mechanisms underlying OP intoxication and ensuing brain damage, and (ii)  
42 help identify novel therapeutic agents to restore CNS functions following acute OP poisoning.

43

44 **KEYWORDS:** Zebrafish model; Organophosphorus (OP) intoxication; Epileptiform seizure;  
45 Neuron toxicity, Diisopropylfluorophosphate (DFP); Respiratory failure.

## 46 1. INTRODUCTION

47 Organophosphorus (OP) compounds are highly toxic molecules used as lethal weapons in  
48 both war situations and terrorist attacks, but also as key chemical pesticides to combat pests and  
49 parasites. As the result of their massive use for agricultural purposes worldwide, OP poisoning  
50 represents today a major public health issue with 3 million severe intoxications reported annually  
51 and more than 200,000 deaths, primarily suicides<sup>1-4</sup>. OP are potent inhibitors of cholinesterase,  
52 including acetylcholinesterase (AChE), causing massive acetylcholine accumulation at cholinergic  
53 synapses and overstimulation of cholinergic receptors at both neuromuscular junctions and CNS  
54 cholinergic synapses<sup>5</sup>. OP-induced cholinergic hyperactivity in the brain can provoke epileptic  
55 seizures, which, if not rapidly treated, may turn into life-threatening status epilepticus<sup>6</sup>. Besides  
56 immediate toxicity, survivors of OP poisoning also face long-term comorbidities that include  
57 psychomotor defects, cognitive deficits and recurrent seizures<sup>7,8</sup>. Existing countermeasures against  
58 OP poisoning are life-saving but not yet sufficiently effective against seizure occurrence and brain  
59 damage. There is thus an urgent need for new therapeutic agents.

60 The generation and characterization of an animal model of OP intoxication faithfully  
61 mimicking the consequences of OP poisoning in humans is urgently needed both for a better  
62 understanding of OP poisoning pathophysiology and for high-throughput screening of therapeutic  
63 entities counteracting the toxicity of these compounds. Rodent OP intoxication models are not fully  
64 pure, because respiratory blockade induced by OP requires mandatory co-administration of both  
65 cholinergic agonist and AChE reactivator with the tested OP compounds. As an alternative  
66 vertebrate species, we describe here a preclinical zebrafish model of OP poisoning and characterize  
67 the neuron defects induced.

68 Over the past decade, besides its skyrocketing use as a human disease model<sup>9–13</sup>, the zebrafish has  
69 become one of the leading animal models for toxicology research<sup>14</sup>. This small and easy-to-breed  
70 fish offers significant advantages for in vivo drug discovery and neurotoxicology investigations,  
71 including a CNS that displays an overall organization similar to that of mammals and full  
72 conservation of different neuron types, neurotransmitters and glial cell types<sup>15–19</sup>.

73 To model OP intoxication in zebrafish, we used diisopropylfluorophosphate (DFP), an  
74 analogue of the chemical warfare agents sarin and soman, which promotes potent AChE inhibition.  
75 However, DFP is safer, less volatile, and much less dangerous for experimentation purposes than  
76 soman, making it an OP fully suited to experimental research. It has been shown that acute DFP  
77 intoxication in rats induces seizures<sup>20</sup> and causes neurodegeneration, memory impairment and  
78 neuroinflammation<sup>20,21</sup>. DFP has been used to model seizures with subsequent behavioral deficits  
79 in rodents<sup>22–25</sup>. However, while it has long been known that acute intoxication with OP nerve agents,  
80 such as sarin, soman and DFP, causes neuropathological changes in the brain in both human  
81 patients and animal models<sup>8,21,26,27</sup>, this brain damage and its extent remain poorly understood.

82 By combining behavioral analysis, respiration measurements, in vivo brain calcium  
83 imaging and molecular and immunocytochemical approaches, we showed that larvae exposed to  
84 DFP displayed motor paralysis correlated with inhibition of AChE activity and depressed  
85 respiration. DFP-treated larvae also showed increases in both c-Fos expression and neuronal  
86 calcium uptakes, which reflect epileptiform seizures. We also observed a marked increase in neuron  
87 apoptosis and excitatory NR2B-NMDA receptor sub-unit accumulation, combined with a  
88 decreased accumulation of both GAD65/67 and gephyrin proteins, reflecting a shift of the synaptic  
89 balance toward excitatory states.

## 90 **2. MATERIALS AND METHODS**

### 91 **2.1 Fish husbandry and zebrafish lines**

92 Zebrafish were kept at 26–28 °C in a 14 h light/10 h dark cycle. Embryos were collected by  
93 natural spawning and raised in E3 solution at 28.5 °C. To inhibit pigmentation, 0.003% 1-phenyl-  
94 2-thiourea was added at 1 day post-fertilization (dpf). Tg[HuC:GCaMP5G] transgenic line was  
95 used to monitor calcium activity, otherwise wild-type AB embryos were used. All the animal  
96 experiments were conducted at the French National Institute of Health and Medical Research  
97 (INSERM) UMR 1141 in Paris in accordance with European Union guidelines for the handling of  
98 laboratory animals ([http://ec.europa.eu/environment/chemicals/lab\\_animals/home\\_en.htm](http://ec.europa.eu/environment/chemicals/lab_animals/home_en.htm)), and  
99 were approved by the Direction Départementale de la Protection des Populations de Paris and the  
100 French Animal Ethics Committee under reference No. 2012-15/676-0069.

### 101 **2.2 DFP treatment**

102 Diisopropylfluorophosphate (DFP) was purchased from Sigma Aldrich. A stock solution  
103 (5.46 mM), stored at -20°C, was diluted extemporaneously to 15  $\mu$ M in 1% DMSO. Control  
104 zebrafish larvae were treated with 1% DMSO.

### 105 **2.3 DFP stability**

106 Ranging amounts of DFP were diluted in 1% DMSO, and 200  $\mu$ L water samples were  
107 removed at different incubation times (0, 2, 4, 6 and 24 h; n = 3 per condition) and were stored at  
108 -20 °C until extraction. 360  $\mu$ L of ethyl acetate (VWR) was added to 180  $\mu$ L of the sample. After  
109 vigorous shaking, an aliquot (100  $\mu$ L) of organic phase was extracted (recovery > 90%) and stored

110 at 4 °C until analysis by gas chromatography-mass spectrometry (GC-MS). GC-MS analyses were  
111 conducted with a gas chromatograph (Agilent 6890N) coupled to a quadrupole mass spectrometer  
112 equipped with an EI source (Agilent MSD5973). After a pulsed splitless injection (40 psi) at  
113 220 °C, the GC separation was performed on an Rtx-OPP2 column (Restek, 30 m x 0.25 mm x  
114 0.25  $\mu$ m) using a linear ramp from 40 °C to 280 °C (20 °C/min). The mobile phase was helium  
115 (99.9995%) at a flow rate of 1.2 mL/min. The source and quadrupole temperatures were set at  
116 230 °C and 150 °C. Acquisition was performed in the SIM (single ion monitoring) mode ( $m/z$  101  
117 and 127 as quantifier and qualifier ions). Operating software was MassHunter Workstation  
118 Quantitative analysis version B.09.00/Build 9.0.647.0. DFP concentrations were calculated based  
119 on a linear calibration curve (individual residuals within  $\pm 20\%$ ), obtained with solutions of DFP in  
120 ethyl acetate between 0.05 and 1.35  $\mu$ g/mL.

## 121 **2.4 Acetylcholinesterase activity**

122 Five dpf zebrafish larvae (20 larvae per sample) were collected at 2 h, 4 h, 6 h post-exposure  
123 to DFP and stored at  $-80$  °C for further analysis. Samples were homogenized in 50 mM phosphate  
124 buffer (pH 7.4)/0.5% Tween using Precellys® homogenizer with 1.4 mm ceramic beads and  
125 centrifuged at  $10,000 \times g$  (4 °C) for 10 min. The resulting supernatants were collected and stored  
126 at  $-80$  °C. Total protein concentrations were determined using the DC Protein Assay (Bio-Rad)  
127 and all the samples were diluted to 1.2 mg/mL. AChE activity was determined by adding 1 mM  
128 acetylthiocholine (Sigma) and 0.22 mM 5,5'-dithiobis-2-nitrobenzoic acid (DTNB, Sigma) to the  
129 sample (0.03 mg/mL of total proteins), the formation of the product resulting from the reaction  
130 between thiocholine and DTNB at 25 °C was monitored for 30 min at 412 nm with a microplate

131 reader. All the samples were assayed in duplicate. The final results were expressed as percentages  
132 of average control activity.

### 133 **2.5 Measurement of oxygen consumption**

134 Five dpf larvae were exposed to DFP or vehicle (1% DMSO) for 4.5 h and then transferred  
135 to 96-well microplates (Greiner Bio-One International) (7 individuals per well) containing 90  $\mu$ L  
136 of E3 medium and 10  $\mu$ L of 35  $\mu$ g/mL MitoXpress Xtra (MitoXpress Xtra Reagent Pack, Agilent  
137 Technologies) that enables real-time measurement of extracellular oxygen consumption in living  
138 larvae. A volume of 100  $\mu$ L of mineral oil (MitoXpress Xtra Reagent Pack, Agilent Technologies)  
139 was added to seal the wells and isolate the reaction medium from ambient air oxygen. Oxygen  
140 consumption was then measured in real time for 90 min at 28 °C in a 96-well plate using a  
141 spectrofluorimeter (Tecan Spark:  $\lambda_{\text{excitation}}$  380 nm,  $\lambda_{\text{emission}}$  650 nm). The areas under the linear  
142 portion of the curve were used to determine O<sub>2</sub> consumption rates.

### 143 **2.6 Hematoxylin/eosin staining**

144 Five dpf larvae were exposed to DFP or vehicle (1% DMSO) and then anesthetized using  
145 0.01% tricaine, fixed with 10% formaldehyde, paraffin-embedded and sectioned. Sections were  
146 deparaffinized and rehydrated before hematoxylin and eosin staining. Freshly stained sections were  
147 treated with ethanol and xylene, and then mounted in Pertex medium. Sections were imaged using  
148 a Nikon Eclipse microscope (E-200) equipped with a digital sight (Nikon).

### 149 **2.7 Zebrafish larval locomotor activity**

150 Locomotor activity of 5 dpf zebrafish larvae was performed as previously described in  
151 Brenet et al, 2019<sup>11</sup>.

## 152 **2.8 RT-qPCR**

153 For RNA isolation, larvae were homogenized using a syringe equipped with a 26G needle  
154 (seven larvae per sample) using the RNA XS Plus kit (Qiagen, Hilden, Germany). cDNA was  
155 synthesized using the iScript<sup>TM</sup> cDNA Synthesis Kit (Bio-Rad, Munich, Germany) and qPCR was  
156 performed using iQ<sup>TM</sup> SYBR Green Supermix (Bio-Rad). Samples were run in triplicate.  
157 Expression levels were normalized to that of *eef1a1*. The primers (Eurofins Genomics, Ebersberg,  
158 Germany) used were: *c-fos*-forw, 5'-AAC CAG ACT CAG GAG TTC AC-3'; *c-fos*-rev, 5'-GGA  
159 GAA AGC TGT TCA GAT CTG-3'; *ee1fa1*-forw, 5'-CCA CTA CGA CTG GTC ACC TC-3';  
160 and *ee1fa1*-rev, 5'-AAG CTT GTC CAG AAC CCA GG-3'.

## 161 **2.9 Neuronal calcium uptake imaging**

162 Calcium imaging of 5 dpf zebrafish larvae was performed as previously described in Brenet  
163 et al, 2019<sup>11</sup>.

## 164 **2.10 Diazepam treatment**

165 Five dpf Tg[Huc:GCaMP5G] larvae were exposed to 15  $\mu$ M DFP for 5 h and then  
166 pancuronium-paralyzed and embedded in 1.1% low-melting agarose in the center of a 35 mm glass-  
167 bottomed dish covered with E3 solution containing 300  $\mu$ M pancuronium bromide. Calcium  
168 uptakes were recorded for 30 min prior to diazepam (40  $\mu$ M DZP, Sigma) addition and calcium



169 activity was then monitored for an additional hour. Calcium activity was measured as described in  
170 Brenet et al, 2019<sup>11</sup>.

## 171 **2.11 Apoptosis labeling**

172 Neuronal cell death was visualized and quantified as previously described in Brenet et al,  
173 2019<sup>11</sup>.

## 174 **2.12 Immunohistochemistry**

175 For synapse protein immunostaining, zebrafish larvae were fixed using 4% formaldehyde,  
176 then directly immersed in 10% sucrose at 4 °C and incubated overnight, embedded in 7.5%  
177 gelatin/10% sucrose solution, flash frozen in isopentane at -45 °C and stored at -80 °C until use.  
178 When needed, frozen embedded zebrafish larvae were cut into 20  $\mu$ m cryostat sections, which were  
179 mounted on superfrost slides. Sections were then washed, blocked and permeabilized with 0.2%  
180 gelatin/0.25% Triton X-100 diluted in PBS. Sections were incubated overnight at room temperature  
181 with either anti-gephyrin antibodies (1:100, rabbit polyclonal, Abcam, Ab185993), anti-NR2B-  
182 NMDA antibodies (1:200, rabbit polyclonal, Abcam, Ab35677), or anti-GAD65/67 antibodies  
183 (1:500, rabbit polyclonal, Abcam, Ab11070). Sections were then washed three times in PBS (5 min  
184 each time) and incubated for 2 h at room temperature, in the dark, with an anti-rabbit IgG  
185 conjugated with Alexa 488 fluorophore (1:500, mouse, Molecular Probes, A-21206). Sections were  
186 finally counterstained for 10 min with 0.3% DAPI, and after a final wash, sections were mounted  
187 in Fluoromount medium and stored at 4 °C.

## 188 **2.13 Synapse quantification**

189           Sections hybridized with anti-gephyrin antibodies were imaged at full resolution (voxel  
190 size: 0.063 x 0.063 x 0.4  $\mu\text{m}$ ) using an inversed Leica TCS SP8 confocal scanning system (Leica  
191 Microsystems) equipped with an oil-immersion objective (Leica 40x HCPL APO CS2, numerical  
192 aperture 1.30). Images were then processed with AutoQuant 3X software (Media Cybernetics) and  
193 the density of post-synaptic puncta was quantified using a homemade ImageJ macro (Zsolt Csaba,  
194 Inserm UMR1141). After applying a median filter on all images, a threshold was applied to  
195 quantify only post-synaptic puncta. Areas of interest that comprised the optic tectum and  
196 telencephalon were selected and all spots with sizes in the range 0.018–3.14  $\mu\text{m}^2$  were considered  
197 as post-synaptic puncta. Post-synaptic density of gephyrin puncta was finally calculated by  
198 dividing the number of puncta detected in a given region by the surface of the region. Images from  
199 four independent experiments were used to calculate mean gephyrin density and corresponding  
200 standard error of the mean (SEM), and to assess the statistical significance of the differences  
201 observed between DFP-treated and control larvae.

## 202    **2.14 Quantification of GAD65/67 and NR2B accumulation**

203           Following GAD65/67 and NR2B (NR2B-NMDA) immunostaining, images of brain  
204 sections were acquired using an inversed Leica TCS SP8 confocal scanning system (Leica  
205 Microsystems) equipped with an oil-immersion objective (Leica 40x HCPL APO CS2, numerical  
206 aperture 1.30). Images were acquired in three dimensions (48.50 x 48.50 x 20  $\mu\text{m}$ ) and the volume  
207 occupied by stained structures was determined using MeasurementPro's Surfaces of the Imaris  
208 software (Bitplane Inc., Version 9.1.2). For both GAD65/67 and NR2B/NMDA, images from three  
209 independent experiments were used to calculate mean GAD65/67 and NR2B staining volumes and

210 corresponding standard errors of the mean (SEM), and to assess statistical significance of the  
211 differences observed between DFP-treated and control larvae.

## 212 **3 RESULTS**

### 213 **3.1 Larvae exposed to DFP showed paralysis and acetylcholinesterase (AChE) inhibition**

214 Prior to the development of a zebrafish model of DFP poisoning, we first measured the  
215 stability of this compound after dilution in fish water. Ranging amounts of DFP were diluted in  
216 fish water and DFP concentrations were determined until 6 hours. Results showed that diluted DFP  
217 was stable in fish water, with an average 2% loss per hour, approximately (Figure S1). Next, to  
218 determine in vivo DFP toxicity in zebrafish, 5 days post-fertilization (dpf) larvae were exposed to  
219 15, 20, 30, and 50  $\mu$ M DFP and studied over a 24 h period. Results showed that all larvae incubated  
220 in 20  $\mu$ M DFP or in higher concentration, either died prior to 6 h exposure or displayed gross  
221 phenotypic defects, including a curly tail and marked reductions of the head's and eyes' volumes  
222 (Figure S2). As we sought to investigate DFP neurotoxicity and subsequent brain damages, we  
223 selected 15  $\mu$ M DFP and an exposure time of 6 h (Figure 1B), an experimental setup that did not  
224 induce any visible phenotype (n = 20) when compared to control larvae exposed to 1% DMSO  
225 (n = 20) (Figure 1C), nor any significant increase in larvae lethality. Histopathological analysis  
226 confirmed that larvae exposed to 15  $\mu$ M DFP showed no visible neurological abnormalities (Figure  
227 S3).

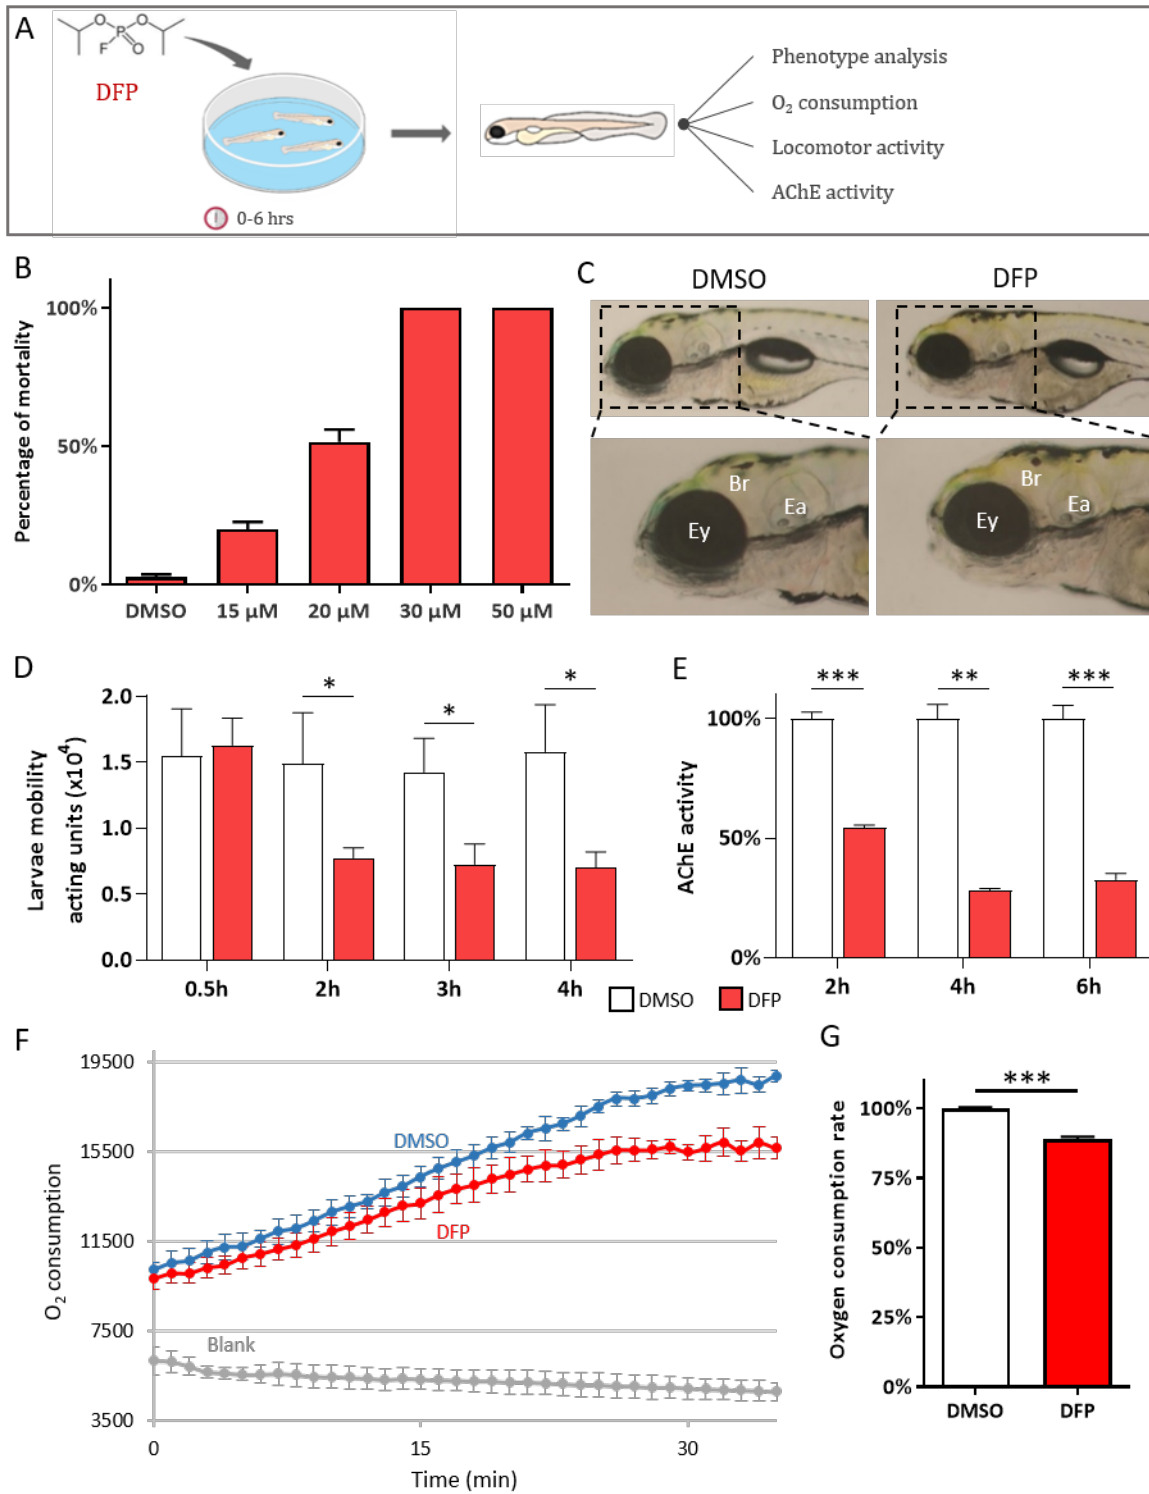

228

229 **Figure 1.** DFP-exposed zebrafish larvae displayed reduced motility, AChE inhibition and  
 230 respiratory failure. **A:** In the experimental set-up, 5 dpf larvae were exposed to 15, 20, 30 and 50

231  $\mu\text{M}$  DFP, and larvae lethality, phenotypic defects, locomotor activity and AChE activity were  
232 studied for 6 h. **B:** Lethality rates of 5 dpf larvae exposed for 6 h to 15, 20, 30 and 50  $\mu\text{M}$  DFP led  
233 us to select 15  $\mu\text{M}$  DFP as optimal concentration (LC20). **C:** 5 dpf larvae exposed for 6 h to either  
234 15  $\mu\text{M}$  DFP or vehicle (DMSO), are phenotypically indistinguishable. **D:** Quantification of AChE  
235 activity in larvae exposed to either 15  $\mu\text{M}$  DFP ( $n = 5$ ) or vehicle (DMSO) ( $n = 5$ ), for 2, 4, and 6  
236 h (Student unpaired t-test: \*\*,  $p < 0.01$ ; \*\*\*,  $p < 0.001$ ). **E:** Locomotor activity of 5 dpf larvae  
237 exposed to either 15  $\mu\text{M}$  DFP ( $n = 48$ ) or vehicle (DMSO) ( $n = 48$ ) (Mann-Whitney test: \*,  $p <$   
238 0.05). **F:** Real-time measurement of oxygen consumption by 5 dpf larvae exposed to either 15  $\mu\text{M}$   
239 DFP or vehicle (DMSO). **G:** Quantification of oxygen consumption rate (OCR) of larvae exposed  
240 to either 15  $\mu\text{M}$  DFP ( $n = 301$ ) or vehicle (DMSO) ( $n = 189$ ) (Student unpaired t-test: \*\*\*,  $p <$   
241 0.001). Abbreviations: Ey, eye; Br, brain; Ea, ear.

### 242 **3.2 AChE inhibition, leading to paralysis and respiratory failure in DFP exposed larvae**

243 As AChE inhibition and muscle paralysis are hallmarks of OP poisoning, we measured the  
244 motor activity of DFP-exposed and control larvae, by measuring the distance swum by these  
245 individuals over a 30-min period. As expected, larvae exposed to DFP ( $n = 48$ ) showed  
246 significantly decreased motor activity compared to their control siblings ( $n = 48$ ) (Figure 1D). We  
247 next estimated AChE activity in larvae exposed to either 15  $\mu\text{M}$  DFP ( $n = 5$ ) or vehicle (DMSO  
248 1%) ( $n = 5$ ). We observed a 50% inhibition of AChE activity as early as 2 h after DFP exposure  
249 (Figure 1E). As respiratory failure is an early consequence of OP poisoning<sup>28,29</sup>, we next quantified  
250 the respiration of larvae exposed to 15  $\mu\text{M}$  DFP by calculating the extracellular oxygen  
251 consumption rate (ORC) of living larvae using the MitoXpress Xtra oxygen consumption assay, a  
252 simple kinetic measurement of oxygen consumption (Figure 1F). Results showed that the OCR of

253 larvae exposed to 15  $\mu$ M DFP were  $88.78 \pm 1.00\%$  of that observed in controls (Figure 1G,  $p <$   
254 0.001). Thus, after DFP exposure, zebrafish larvae displayed strong inhibition of AChE activity,  
255 decreased oxygen consumption, and reduced motor activity.

### 256 **3.3 DFP exposure promoted neuronal hyperexcitation and apoptosis**

257 Increase in c-Fos expression, a molecular marker of activity, is observed during seizures<sup>30</sup>,  
258 and has been shown to promote epileptogenesis<sup>31-34</sup>. As a first attempt to evaluate the consequences  
259 of DFP poisoning on neuronal activity, we studied c-Fos expression in DFP-treated and control  
260 sibling larvae. Interestingly, qRT-PCR revealed a significant increase in c-Fos mRNA  
261 accumulation following DFP poisoning (Figure 2B,  $p < 0.001$ ), suggesting increased neuronal  
262 excitation. We then sought to visualize neuronal activity in live brains of larvae exposed to DFP  
263 using calcium imaging. Indeed, transient calcium uptakes in neurons, as revealed by GCaMP5G  
264 fluorescent protein, fully correlates neuronal excitation in zebrafish epilepsy models, allowing to  
265 visualize seizures in vivo at the level of a whole brain<sup>11,35</sup>. Five dpf larvae from the transgenic line  
266 Tg[Huc:GCaMP5G] were treated with DFP and neuronal activity was recorded during the 6 h of  
267 incubation time using time-lapse confocal microscopy (Figure 2E, and supplementary video 2). As  
268 early as 20 min following DFP addition, some intense transient calcium uptake events were  
269 detected; their number and intensity progressively increased over the next 2 hours (Figure 2F, G).  
270 Then, 2 - 3 hours following DFP addition, all DFP-treated larvae ( $n = 5$ ) displayed massive, brief  
271 and synchronous calcium uptake events in both neuropils of the optic tectum neurons, strongly  
272 reminiscent of those seen during generalized seizures in zebrafish epilepsy models (Figure 2C2).

273 To confirm that the increase in neuronal calcium uptakes observed in DFP-exposed larvae  
274 did correspond to actual neuronal hyperexcitation, we ascertained whether administration of

275 diazepam, the main drug administered to epileptic patients to relieve seizures<sup>36</sup>, alleviated calcium  
276 uptake activity. Larvae were first exposed to DFP (15  $\mu$ M) for 5 h, and their neuronal calcium  
277 activity was recorded for 30 minutes; diazepam (40  $\mu$ M) was then added and their neuronal calcium  
278 activity was recorded for an additional 60 min. Interestingly, exposure to diazepam significantly  
279 decreased neuronal excitation induced by DFP (Figure 2H, I). All these data confirm that DFP  
280 exposure caused an intense neuronal hyperexcitation.

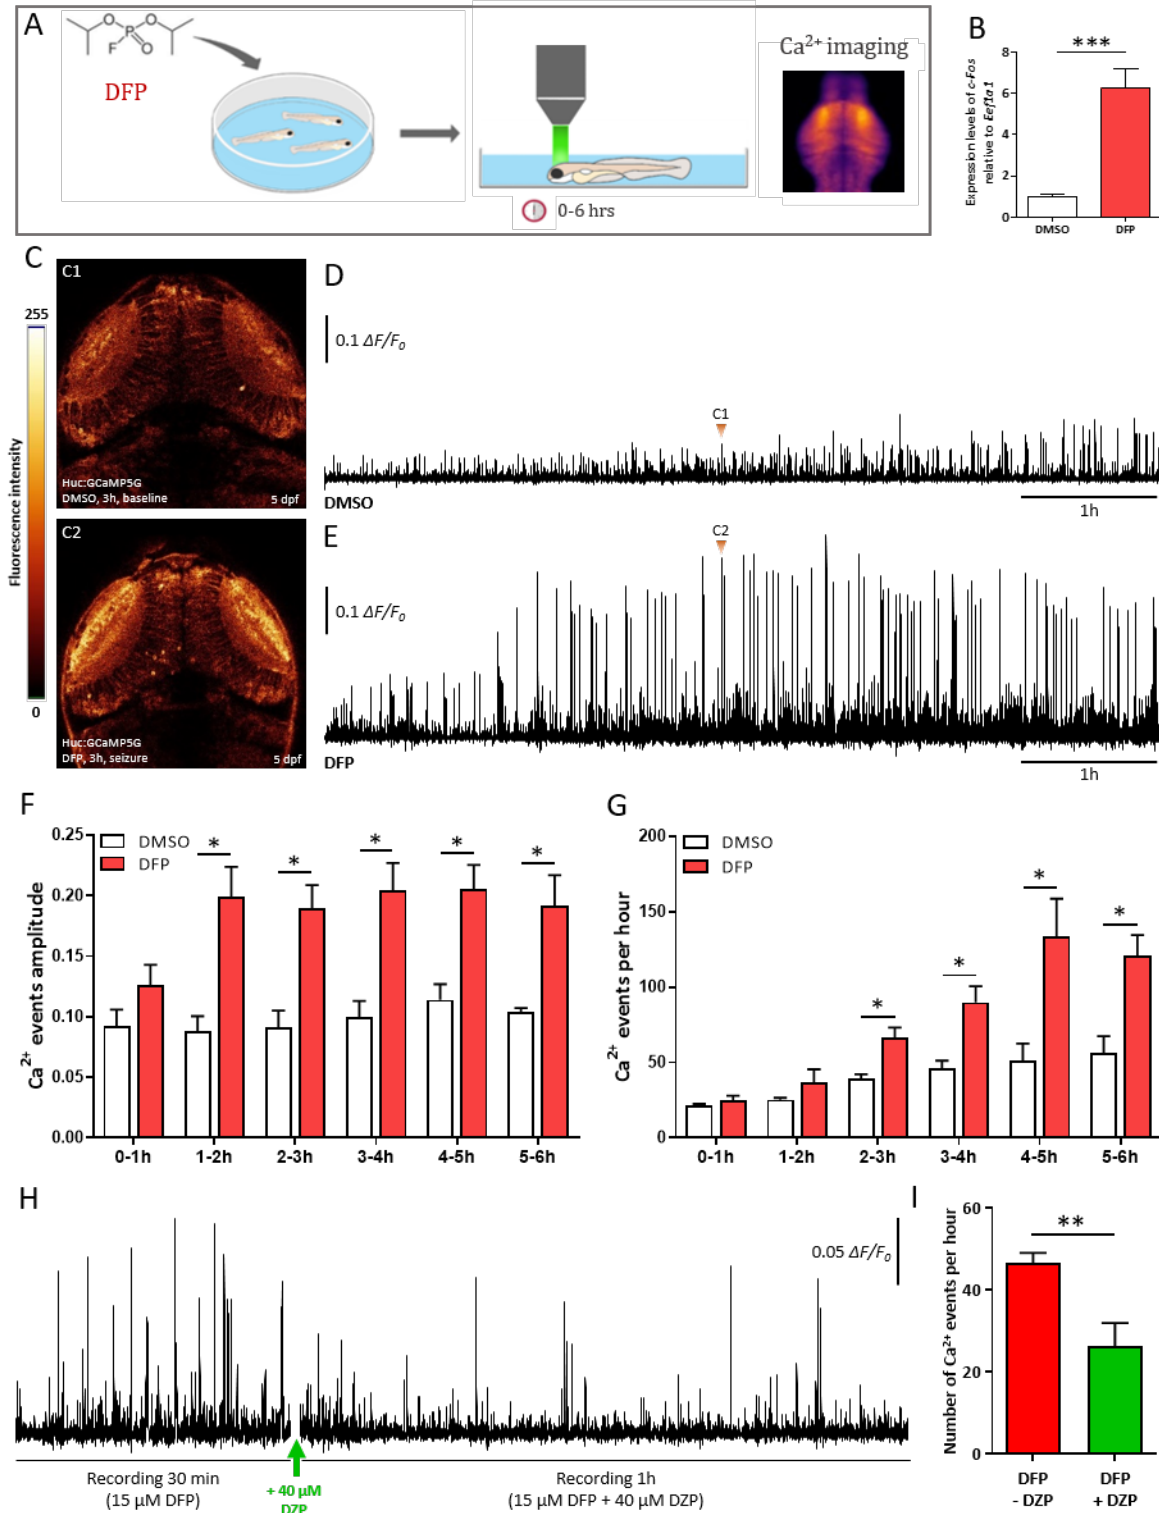

281  
 282 **Figure 2.** DFP exposure caused increased neuron excitation. **A:** In the experimental set-up, 5 dpf  
 283 Tg[Huc:GCaMP5G] larvae were exposed to either 15  $\mu$ M DFP or vehicle (DMSO), and transient



284 calcium uptakes were then recorded in brain neurons over 6 h using calcium imaging. **B:** qRT-PCR  
285 demonstrated markedly increased expression of the *C-Fos* gene in larvae exposed to 15  $\mu$ M DFP  
286 (n = 19) when compared to that in control larvae (DMSO) (n = 19) (Student unpaired t-test: \*\*\*, p  
287 < 0.001). **C,** Snapshot views of calcium imaging of 5 dpf Tg[Huc:GCaMP5G] larvae brain showing  
288 baseline calcium activity (C1 in Figure 2D) and seizure-like hyperactivity (C2 in Figure 2E) seen  
289 3 h after 15  $\mu$ M DFP exposure. **D:** Transient calcium uptakes in 5 dpf Tg[Huc:GCaMP5G] larvae  
290 treated with vehicle (DMSO) (n = 5). **E:** Transient calcium uptakes in 5 dpf Tg[Huc:GCaMP5G]  
291 larvae exposed to 15  $\mu$ M DFP (n = 5). **F:** Amplitude of calcium uptake events in 5 dpf  
292 Tg[Huc:GCaMP5G] larvae at different time points during exposure to either 15  $\mu$ M DFP (n = 5)  
293 or vehicle (DMSO) (n = 5) (Student unpaired t-test: \*, p < 0.05). **G:** Number of calcium uptake  
294 events showing  $\Delta F/F_0 > 0.04$  in 5 dpf Tg[Huc:GCaMP5G] larvae at different time points during  
295 exposure to either 15  $\mu$ M DFP (n = 5) or vehicle (DMSO) (n = 5) (Student unpaired t-test: \*, p <  
296 0.05). **H:** Pattern of transient calcium uptake events in 5 dpf Tg[Huc:GCaMP5G] larvae exposed  
297 to 15  $\mu$ M DFP for 5 h and then to 15  $\mu$ M DFP + 40  $\mu$ M diazepam (DZP) for one more hour. **I:**  
298 Number of calcium uptake events showing  $\Delta F/F_0 > 0.04$  in 5 dpf Tg[Huc:GCaMP5G] larvae  
299 exposed to either 15  $\mu$ M DFP or 15  $\mu$ M DFP + 40  $\mu$ M diazepam (DZP) (Student unpaired t-test: p  
300 = 0.009).

301 Exposure to highly toxic OP compounds (soman, sarin, VX) has been shown to cause  
302 elevated neuronal loss in both humans and animal models<sup>24,37-40</sup>. We thus examined whether the  
303 larvae exposed to DFP showed an increase in neuronal death. Using acridine orange (AO), a vital  
304 marker that labels dying cells, we first observed in living larvae a marked increase in the number  
305 of cells showing AO staining in DFP-exposed larvae compared to controls (Figure 3C, D, E). Anti-

306 activated-caspase-3 immunolabeling confirmed that DFP exposure promotes neuronal apoptosis  
307 (Figure 3F, G, H).

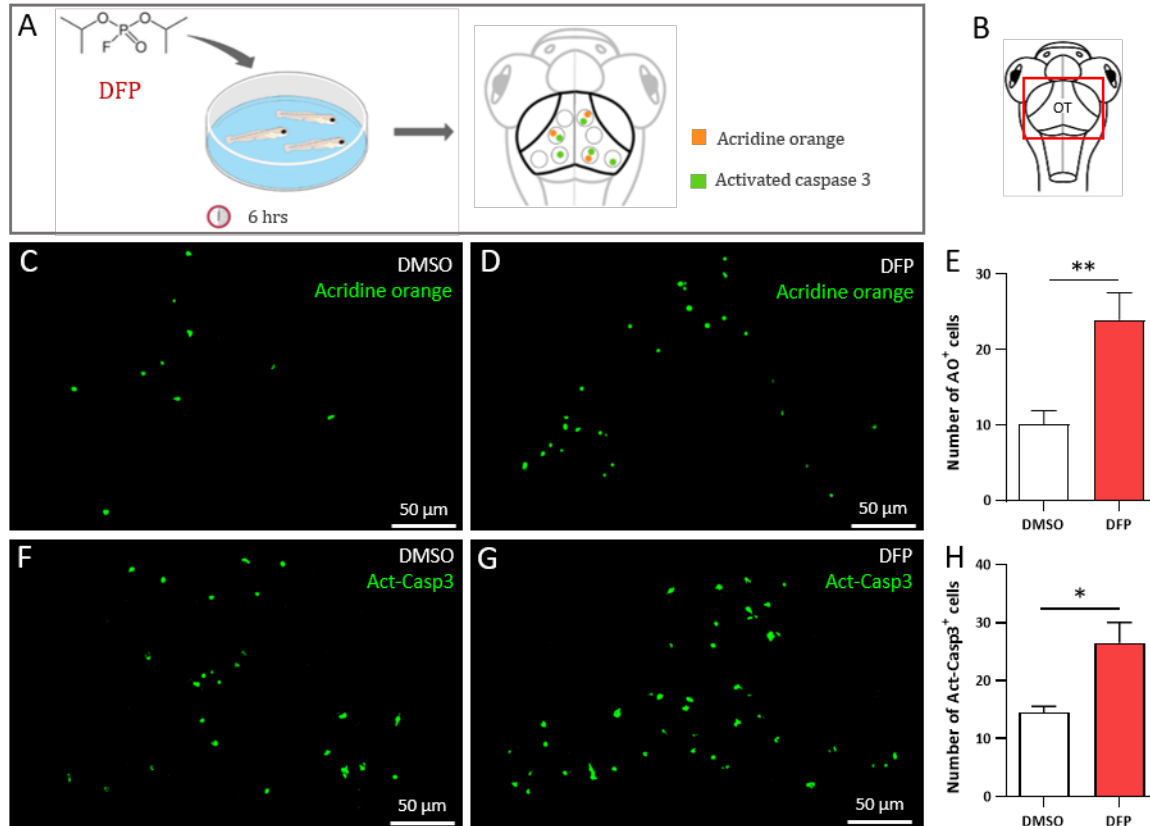

308  
309 **Figure 3.** DFP exposure promoted increased neuron apoptosis. **A:** In the experimental set-up, 5 dpf  
310 larvae were exposed to either 15  $\mu$ M DFP or vehicle (DMSO) for 6 h, prior to acridine orange  
311 staining or anti-activated caspase-3 immunolabeling. **B:** Scheme of 5 dpf larva head with the red  
312 box showing the region of interest in the brain uncovering the optic tectum (OT). **C** and **D:** Acridine  
313 orange labeling of dead neuronal cells in 5 dpf larvae exposed for 6 h to either vehicle (DMSO)  
314 (C) or 15  $\mu$ M DFP (D). Scale bar: 50  $\mu$ m. **E:** Number of acridine orange-positive cells in 5 dpf  
315 larvae exposed for 6 h to either vehicle (DMSO) (n = 8) or 15  $\mu$ M DFP (n = 10) (Student unpaired  
316 t-test: p = 0.002). **F** and **G:** Anti-activated caspase-3 (Act-Casp3) immunolabeling of dying  
317 neuronal cells in 5 dpf larvae exposed for 6 h to either vehicle (DMSO) (F) or 15  $\mu$ M DFP (G).

318 Scale bar: 50  $\mu$ m. **H**: Number of activated-caspase-3 positive cells in 5 dpf larvae exposed for 6 h  
319 to either vehicle (DMSO) (n = 7) or 15  $\mu$ M DFP (n = 8) (Student unpaired t-test with Welch's  
320 correction: p = 0.01).

### 321 **3.5 Increased NR2B-NMDA receptor expression and decreased GAD65/67 and gephyrin** 322 **protein accumulation in DFP exposed larvae**

323 It has been shown that following OP exposure, AChE inhibition causes an acute stimulation  
324 of cholinergic receptors, inducing increased neuronal glutamatergic response, and excessive  
325 NMDA receptor activation<sup>41-43</sup>. To examine whether accumulation of the NR2B-NMDA receptor  
326 sub-unit, a major excitatory glutamate receptor, was affected following DFP exposure, brain  
327 sections of larvae exposed to DFP and control siblings were analyzed by immunocytochemistry  
328 using an anti-NR2B-NMDA receptor antibody (Figure 4A, excitatory synapse). Interestingly,  
329 results showed a clear increase in NR2B-NMDA accumulation in the brains of DFP-exposed  
330 larvae, compared to untreated controls (Figure 4C, Supplementary video 3 and 4). The increased  
331 NR2B-NMDA accumulation induced by DFP poisoning was confirmed by quantification of  
332 NR2B-NMDA staining using Imaris software (Bitplane Inc., Version 9.1.2) (Figure 4G). To further  
333 characterize neuronal networks in DFP-treated larvae, we analyzed the accumulation of glutamate  
334 decarboxylase (GAD65/67), an enzyme involved in GABA synthesis in presynaptic inhibitory  
335 synapses, and gephyrin, a protein that anchors postsynaptic GABA receptors to the cytoskeleton,  
336 using anti-GAD65/67 and anti-gephyrin antibodies, respectively (Figure 4A, inhibitory synapse).  
337 Interestingly, following DFP exposure, we observed a significant decrease in the accumulation of  
338 both GAD65/67 (Figure 4D) and gephyrin (Figure 4F). Labeling quantification using Imaris

339 software (Bitplane Inc., Version 9.1.2) confirmed the decreased accumulation of both GAD65/67  
 340 (Figure 4H) and gephyrin in DFP-treated larvae (Figure 4I).

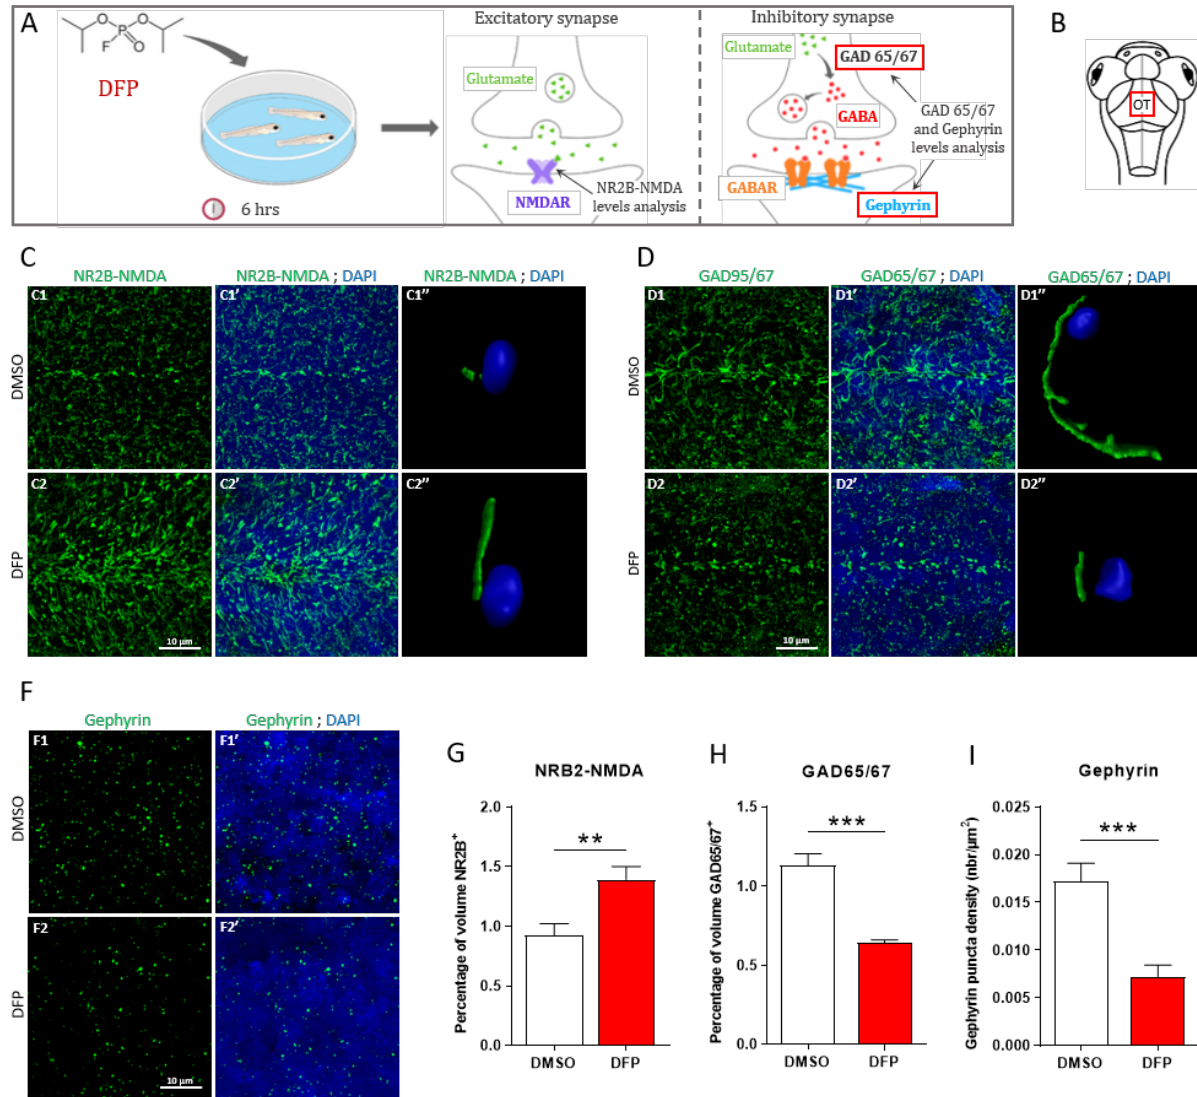

341

342 **Figure 4.** DFP exposure provoked increased NR2B-NMDA receptor accumulation. **A:** As  
 343 experimental set-up, 5 dpf larvae were exposed to either 15  $\mu$ M DFP or vehicle (DMSO) for 6  
 344 hours, prior to NR2B-NMDA immunolabelling of glutamatergic/excitatory synapses. **B:** Scheme  
 345 of 5 dpf larvae head with the red box showing the region of interest in the brain uncovering the  
 346 optic tectum (OT). **C:** Anti-NR2B-NMDA receptor immunolabelling of glutamatergic synapses

347 (C1 to C2') and DAPI staining (C1', C2') in 5 dpf larvae exposed for 6 hours to either vehicle  
348 (DMSO) (C1, C1') or 15  $\mu$ M DFP (C2, C2'). Scale bar: 10  $\mu$ m. 3D image reconstruction of NR2B-  
349 NMDA labeled neuron branch details in 5 dpf larvae exposed for 6 hours to either vehicle (DMSO)  
350 (C1'') or 15  $\mu$ M DFP (C2''). **D:** Anti-GAD 65/67 immunolabeling of GABAergic presynapses (D1  
351 to D2') and DAPI staining (D1', D2') in 5 dpf larvae exposed for 6 h to either vehicle (DMSO) (D1,  
352 D1') or 15  $\mu$ M DFP (D2, D2'). Scale bar: 10  $\mu$ m. **D,** 3D image reconstruction of GAD 65/67 labeled  
353 neuron branch details in 5 dpf larvae exposed for 6 h to either vehicle (DMSO) (D1'') or 15  $\mu$ M  
354 DFP (D2''). **F:** Anti-gephyrin immunolabeling of GABAergic presynapses (F1 to F2') and DAPI  
355 staining (F1', F2') in 5 dpf larvae exposed for 6 h to either vehicle (DMSO) (F1, F1') or 15  $\mu$ M DFP  
356 (F2, F2'). Scale bar: 10  $\mu$ m. **G:** Quantification of the volume of NR2B-NMDA labeled branch  
357 material in 5 dpf larvae treated for 6 hours with either vehicle (DMSO) (n = 13) or 15  $\mu$ M DFP (n  
358 = 13) (Student unpaired t-test: p = 0.004). **H:** Quantification of the volume of GAD 65/67 labeled  
359 branch material in 5 dpf larvae treated for 6 h with either vehicle (DMSO) (n = 14) or 15  $\mu$ M DFP  
360 (n = 14) (Student unpaired t-test with Welch's correction: \*\*\*, p < 0.001). **I:** Quantification of the  
361 density of gephyrin puncta in 5 dpf larvae treated for 6 h with either vehicle (DMSO) (n = 20) or  
362 15  $\mu$ M DFP (n = 20) (Mann-Whitney: \*\*\*, p < 0.001).

#### 363 **4. DISCUSSION**

364 Because of their use for agricultural purposes worldwide, acute poisoning by OP  
365 compounds is a major public health problem, with several millions of intoxications reported each  
366 year<sup>44,45</sup>. In this work, we took advantage of the possibilities offered by zebrafish larvae to develop  
367 an animal model of OP poisoning and study the consequences of OP exposure on neuronal network  
368 activity. Interestingly, as described in mammalian models of OP poisoning<sup>46,47</sup>, zebrafish larvae

369 exposed to DFP displayed marked AChE inhibition, the hallmark of OP intoxication, validating  
370 this small fish as a good model for investigating the consequences of OP poisoning. One of the  
371 most devastating features of OP intoxication in both humans and rodents is full, sometimes fatal,  
372 respiratory failure<sup>28</sup>. It is important to note that in epileptic OP intoxication models that use  
373 mammals, the induced respiratory failure must be prevented by the simultaneous addition of  
374 cholinergic inhibitors (atropine) and AChE reactivators (oximes) to avoid premature death<sup>29</sup>. By  
375 contrast, although we observed that DFP-treated larvae showed significantly decreased oxygen  
376 consumption, there was no need to protect larvae with cholinergic inhibitors. Thus, DFP-exposed  
377 zebrafish larvae appeared as a powerful and simple model to test the effects of anti-convulsive  
378 agents in absence of either muscarinic antagonists or cholinesterase reactivators.

379         It has been demonstrated that acute OP exposure causes epileptic-like seizures, which, if  
380 not treated, can eventually lead to life-threatening status epilepticus<sup>47</sup>. We therefore investigated  
381 neuronal excitation in larvae exposed to DFP. We first found that larvae exposed to DFP showed  
382 increased expression of c-Fos, a marker of neuronal activity, which is overexpressed after  
383 seizures<sup>48-50</sup>. We next recorded neuronal calcium uptakes in living larvae exposed to DFP, a  
384 technology that enables visualization of epileptic seizures<sup>11,35</sup>. In DFP-exposed larvae, as early as  
385 20 minutes following OP addition, we observed neurons showing massive calcium uptake events  
386 that were never seen in control siblings, and which number increased over the next 2 h. Moreover,  
387 the OP-induced neuronal activity was potently alleviated by diazepam treatment, confirming that  
388 larvae exposed to DFP show neuronal hyperexcitation reflecting epileptiform seizures. In humans,  
389 if victims are not treated within the first 30 minutes, seizures caused by OP intoxication can end in  
390 status epilepticus, a major life-threatening neurologic disorder<sup>6,51</sup>, also leading to long term brain  
391 damages<sup>52,53</sup>. This 30-minute long status epilepticus window frame also appears to be a critical

392 period during which long-term brain lesions are generated<sup>51</sup>. In the Tokyo subway attack,  
393 approximately 3% of OP-poisoned victims suffered convulsions<sup>54</sup>. Interestingly, 2 - 3 h after DFP  
394 exposure, we observed that all the DFP-exposed larvae showed massive synchronous calcium  
395 uptake events, strongly reminiscent of generalized seizures seen in zebrafish epilepsy models<sup>11,35</sup>,  
396 suggesting that these larvae displayed a status epilepticus-like phenotype.

397         Together with AChE inhibition and neuronal seizures, massive neuronal death is another  
398 hallmark of OP poisoning<sup>20</sup>, also observed in the DFP-exposed zebrafish larvae. At the cellular  
399 level, it has long been known that hyperactivity of cholinergic receptors induces a massive release  
400 of glutamate, leading to over-activation of glutamatergic receptors and neuronal  
401 hyperexcitability<sup>41-43</sup>. Specifically, it has been shown that acute OP intoxication induces the  
402 activation of NMDA receptors<sup>55</sup>. Moreover, in a mammalian model of OP poisoning, activation of  
403 NMDA receptors plays essential roles in seizure activity and apoptosis<sup>52,56</sup>. In the brain of zebrafish  
404 larvae exposed to DFP, we observed a decreased accumulation of both gephyrin and GAD65/67,  
405 two proteins specifically accumulated in inhibitory synapses, while NR2B-NMDA receptor was  
406 significantly overexpressed. This suggests that following acute DFP poisoning, neuronal  
407 hyperexcitation results from a shift in the synaptic balance of brain neurons toward excitatory  
408 states.

409         We report here a vertebrate model of OP poisoning that displays phenotypes and symptoms  
410 of acute toxicity, faithfully recapitulating those described in humans, i.e. AChE inhibition,  
411 respiratory deficit, neuronal apoptosis and epileptiform seizures. The zebrafish is thus a model of  
412 choice for large-scale screening of entities that could restore CNS functions after OP poisoning and  
413 mitigate the long-term neurological sequelae of acute OP poisoning in humans.

414 **ACKNOWLEDGMENTS**

415 We thank Christiane Romain (Inserm UMR 1141) and Olivier Bar (Inserm UMR 1141).

416 **DISCLOSURE**

417 The authors declare that the research was conducted in the absence of any commercial or financial  
418 relationships that could be construed as a potential conflict of interest.

419 **SUPPLEMENTARY MATERIAL**

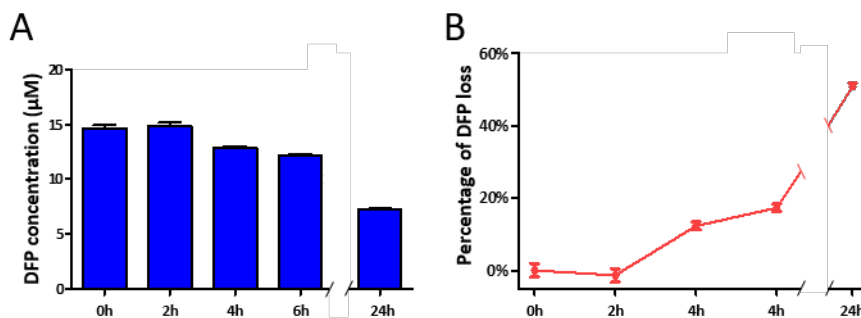

420 **Figure S1.** Monitoring the stability of DFP diluted in FW. A: Residual concentrations of DFP  
421 measured at different time points following dilution to 15 µM in FW. B: Percentage of DFP loss  
422 over time showing a 2% loss per hour, approximately.  
423



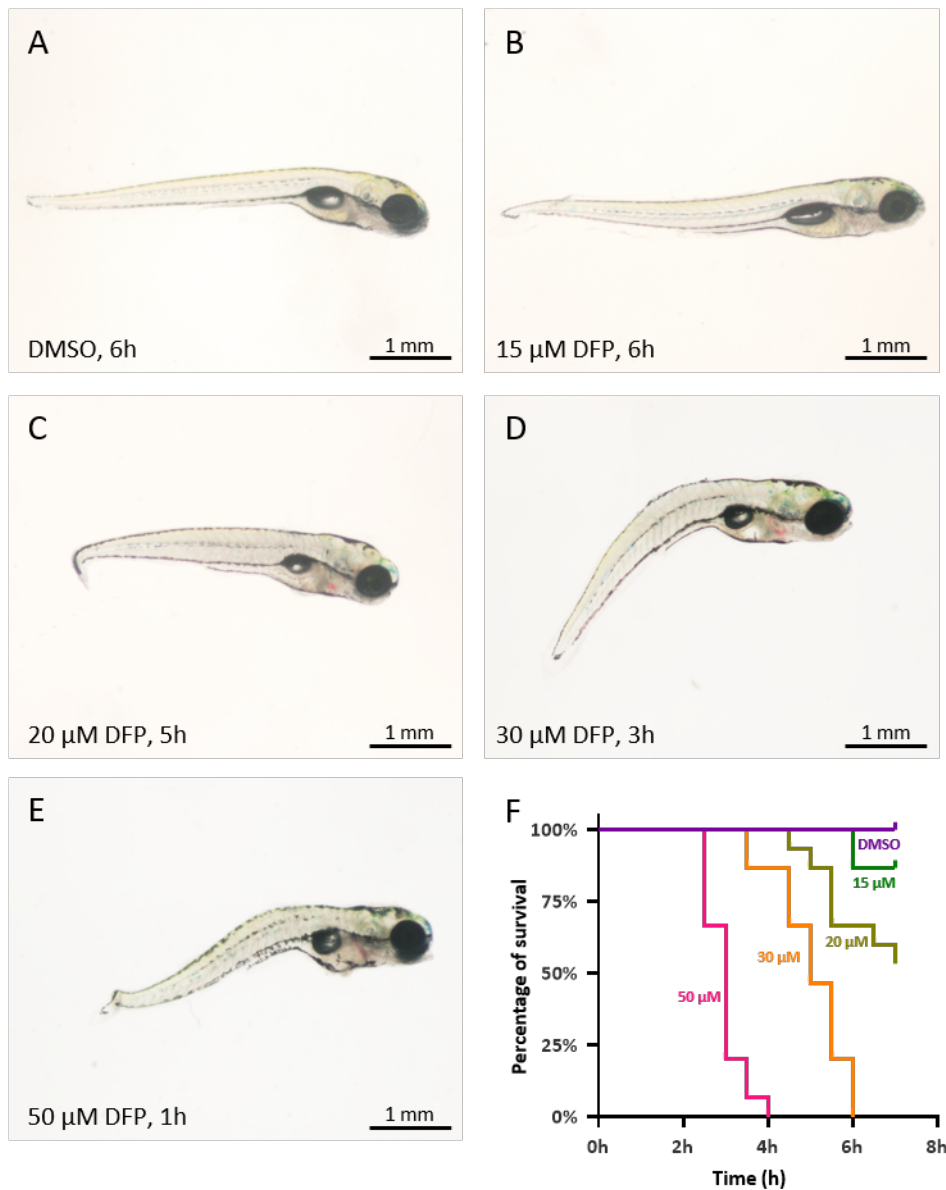

424  
425 **Figure S2.** DFP exposure caused phenotypic defects and larval lethality. A-E: Phenotypes of 5  
426 dpf larvae exposed to either vehicle (DMSO) for 6 h (A), or 15  $\mu$ M DFP for 6 h (B), or 20  $\mu$ M DFP  
427 for 5 h (C), or 30  $\mu$ M DFP for 3 h (D), or 50  $\mu$ M for 1 h (E). Scale bar: 1 mm. F: Survival curve of  
428 5 dpf larvae exposed to either vehicle (DMSO) or 15, 20, 30 or 50  $\mu$ M DFP.

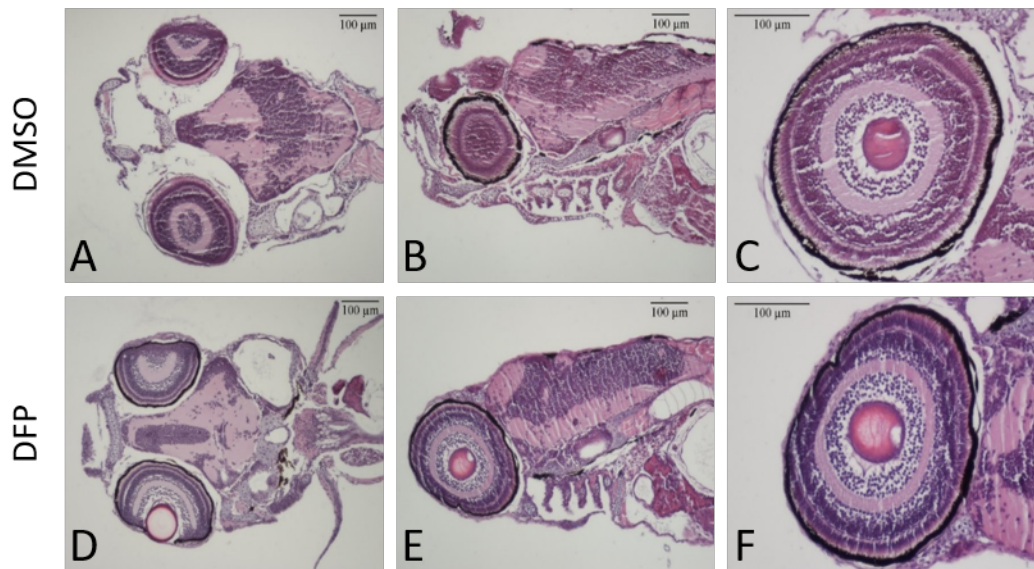

429  
430 **Figure S3.** Zebrafish larvae exposed for 6 h to 15  $\mu\text{M}$  DFP do not show visible phenotypic defects.

431 A-F Horizontal (A, D) and sagittal (B, C, E, F) tissue sections of 5 dpf larvae (A, B, D, E) and  
432 corresponding eyes (C, F), following exposure for 6 h to either vehicle (DMSO) (A, B, C) or 15  
433  $\mu\text{M}$  DFP (D, E, F).

434 **Supplementary Video 1.** 3 minute-long representative recording of calcium activity imaging in  
435 optic tectum neurons of 5 dpf larvae following 3 h exposure to vehicle (DMSO). Movie played at  
436 25 fps.

437 **Supplementary Video 2.** 3 minute-long representative recording of calcium activity imaging in  
438 optic tectum neurons of 5 dpf larvae following 3 h exposure to 15  $\mu\text{M}$  DFP. Movie played at 25  
439 fps.

440 **Supplementary Video 3.** 3D reconstruction of the image depicted in Figure 4C1', showing the  
441 optic tectum from a 5 dpf larva exposed for 6 h to vehicle (DMSO) and labeled with an anti-NR2B-  
442 NMDA antibody (green) and counterstained with DAPI (blue). 3D images were generated using  
443 Imaris software (Bitplane Inc., Version 9.1.2).

444 **Supplementary Video 4.** 3D reconstruction of the image depicted in Figure 4C2', showing the  
445 optic tectum from a 5 dpf larva exposed for 6 h to 15  $\mu$ M DFP and labeled with an anti-NR2B-  
446 NMDA antibody (green) and counterstained with DAPI (blue). 3D images were generated using  
447 Imaris software (Bitplane Inc., Version 9.1.2).

448 **Supplementary Video 5.** 3D reconstruction of the image depicted in Figure 5C1', showing the  
449 optic tectum from a 5 dpf larva exposed for 6 h to vehicle (DMSO) and labeled with an anti-GAD  
450 65/67 antibody (green) and counterstained with DAPI (blue). 3D images were generated using  
451 Imaris software (Bitplane Inc., Version 9.1.2).

452 **Supplementary Video 6.** 3D reconstruction of the image depicted in Figure 5C2', showing the  
453 optic tectum from a 5 dpf larva exposed for 6 h to 15  $\mu$ M DFP and labeled with an anti-GAD 65/67  
454 antibody (green) and counterstained with DAPI (blue). 3D images were generated using Imaris  
455 software (Bitplane Inc., Version 9.1.2).

456 **Funding:** This work was supported by Institut National de la Santé et la Recherche Médicale  
457 (INSERM), the Centre National de la Recherche Scientifique (CNRS), the French National  
458 Research Agency (ANR-16-CE18-0010), and Fondation NRJ (Institut de France), and the Agence  
459 de l'Innovation de Défense. Funding sources had no involvement in study design, collection,  
460 analysis or interpretation of data, or decision to publish.

461 **Author Contributions:** A.B., performed the experiments, the analysis, and designed the figures.  
462 N.S.Y. supervised the project and wrote the manuscript. J.S., performed the respiratory  
463 experiments, R.H.A., R.L., M.P., A.I., D.S., and N.T. helped carry out the experiments .N.D. helped  
464 supervise the project. C.Y. G.D.B., F.N., N.D, contributed to the final manuscript.

465 **REFERENCES:**

- 466 1. Mew EJ, Padmanathan P, Konradsen F, et al. The global burden of fatal self-poisoning with  
467 pesticides 2006-15: Systematic review. *J Affect Disord.* 2017;219(May):93-104.  
468 doi:10.1016/j.jad.2017.05.002
- 469 2. Konickx LA, Worek F, Jayamanne S, Thiermann H, Buckley NA, Eddleston M. Reactivation  
470 of Plasma Butyrylcholinesterase by Pralidoxime Chloride in Patients Poisoned by WHO  
471 Class II Toxicity Organophosphorus Insecticides. 2013. doi:10.1093/toxsci/kft217
- 472 3. Pereira EFR, Aracava Y, Detolla LJ, et al. Animal Models That Best Reproduce the Clinical  
473 Manifestations of Human Intoxication with Organophosphorus Compounds. *J Pharmacol*  
474 *Exp Ther J Pharmacol Exp Ther.* 2014;350:313-321. doi:10.1124/jpet.114.214932
- 475 4. Jett DA. Neurological aspects of chemical terrorism. *Ann Neurol.* 2007;61(1):9-13.  
476 doi:10.1002/ana.21072
- 477 5. Lotti M. Clinical Toxicology of Anticholinesterase Agents in Humans. In: *Hayes' Handbook*  
478 *of Pesticide Toxicology.* Elsevier Inc.; 2010:1543-1589. doi:10.1016/B978-0-12-374367-  
479 1.00072-0
- 480 6. Todorovic MS, Cowan ML, Balint CA, Sun C, Kapur J. Characterization of status epilepticus  
481 induced by two organophosphates in rats. *Epilepsy Res.* 2012;101(3):268-276.  
482 doi:10.1016/j.eplepsyres.2012.04.014
- 483 7. Chen Y. Organophosphate-induced brain damage: mechanisms, neuropsychiatric and  
484 neurological consequences, and potential therapeutic strategies. *Neurotoxicology.*  
485 2012;33(3):391-400. doi:10.1016/j.neuro.2012.03.011
- 486 8. Collombet J-M. Nerve agent intoxication: Recent neuropathophysiological findings and  
487 subsequent impact on medical management prospects. 2011.  
488 doi:10.1016/j.taap.2011.07.003
- 489 9. Yanicostas C, Ernest S, Dayraud C, Petit C, Soussi-Yanicostas N. Essential requirement for  
490 zebrafish anosmin-1a in the migration of the posterior lateral line primordium. *Dev Biol.*  
491 2008;320(2):469-479. doi:10.1016/j.ydbio.2008.06.008
- 492 10. Martin E, Yanicostas C, Rastetter A, et al. Spatacsin and spastizin act in the same pathway  
493 required for proper spinal motor neuron axon outgrowth in zebrafish. *Neurobiol Dis.*  
494 2012;48(3):299-308. doi:10.1016/j.nbd.2012.07.003
- 495 11. Brenet A, Hassan-Abdi R, Somkhit J, Yanicostas C, Soussi-Yanicostas N. Defective  
496 Excitatory/Inhibitory Synaptic Balance and Increased Neuron Apoptosis in a Zebrafish

- 497 Model of Dravet Syndrome. *Cells*. 2019;8(10):1199. doi:10.3390/cells8101199
- 498 12. Ghoumid J, Drevillon L, Alavi-Naini SM, et al. ZEB2 zinc-finger missense mutations lead to  
499 hypomorphic alleles and a mild Mowat-Wilson syndrome. *Hum Mol Genet*.  
500 2013;22(13):2652-2661. doi:10.1093/hmg/ddt114
- 501 13. Yanicostas C, Barbieri E, Hibi M, Brice A, Stevanin G, Soussi-Yanicostas N. Requirement for  
502 Zebrafish Ataxin-7 in Differentiation of Photoreceptors and Cerebellar Neurons. *PLoS One*.  
503 2012;7(11). doi:10.1371/journal.pone.0050705
- 504 14. MacRae CA, Peterson RT. Zebrafish as tools for drug discovery. *Nat Rev | DRUG Discov*.  
505 2015;14:721-731. doi:10.1038/nrd4627
- 506 15. Lessman CA. The developing zebrafish (*Danio rerio*): A vertebrate model for high-  
507 throughput screening of chemical libraries. *Birth Defects Res Part C - Embryo Today Rev*.  
508 2011;93(3):268-280. doi:10.1002/bdrc.20212
- 509 16. Delvecchio C, Tiefenbach J, Krause HM. The Zebrafish: A powerful platform for in vivo, HTS  
510 drug discovery. *Assay Drug Dev Technol*. 2011;9(4):354-361. doi:10.1089/adt.2010.0346
- 511 17. Rinkwitz S, Mourrain P, Becker TS. Zebrafish: An integrative system for neurogenomics and  
512 neurosciences. *Prog Neurobiol*. 2011;93(2):231-243. doi:10.1016/j.pneurobio.2010.11.003
- 513 18. Ito H, Yamamoto N. Non-laminar cerebral cortex in teleost fishes? *Biol Lett*. 2009;5(1):117-  
514 121. doi:10.1098/rsbl.2008.0397
- 515 19. Wullimann MF. Secondary neurogenesis and telencephalic organization in zebrafish and  
516 mice: a brief review. *Integr Zool*. 2009;4(1):123-133. doi:10.1111/j.1749-  
517 4877.2008.00140.x
- 518 20. Flannery BM, Bruun DA, Rowland DJ, et al. Persistent neuroinflammation and cognitive  
519 impairment in a rat model of acute diisopropylfluorophosphate intoxication. *J*  
520 *Neuroinflammation*. 2016;13(1):1-16. doi:10.1186/s12974-016-0744-y
- 521 21. Li Y, Lein PJ, Liu C, et al. Spatiotemporal pattern of neuronal injury induced by DFP in rats:  
522 A model for delayed neuronal cell death following acute OP intoxication. *Toxicol Appl*  
523 *Pharmacol*. 2011;253(3):261-269. doi:10.1016/j.taap.2011.03.026
- 524 22. Auta J, Costa E, Davis J, Guidotti A. Imidazenil: a potent and safe protective agent against  
525 diisopropyl fluorophosphate toxicity. *Neuropharmacology*. 2004;46(3):397-403.  
526 doi:10.1016/j.neuropharm.2003.09.010
- 527 23. Deshpande LS, Carter DS, Blair RE, DeLorenzo RJ. Development of a Prolonged Calcium  
528 Plateau in Hippocampal Neurons in Rats Surviving Status Epilepticus Induced by the

- 529 Organophosphate Diisopropylfluorophosphate. *Toxicol Sci.* 2010;116(2):623-631.  
530 doi:10.1093/toxsci/kfq157
- 531 24. Kim YB, Hur GH, Shin S, Sok DE, Kang JK, Lee YS. Organophosphate-induced brain injuries:  
532 delayed apoptosis mediated by nitric oxide. *Environ Toxicol Pharmacol.* 1999;7(2):147-152.  
533 <http://www.ncbi.nlm.nih.gov/pubmed/21781920>. Accessed September 2, 2019.
- 534 25. Wright LKM, Liu J, Nallapaneni A, Pope CN. Behavioral sequelae following acute  
535 diisopropylfluorophosphate intoxication in rats: comparative effects of atropine and  
536 cannabinomimetics. *Neurotoxicol Teratol.* 2010;32(3):329-335.  
537 doi:10.1016/j.ntt.2009.12.006
- 538 26. McDonough JH, Shih TM. Neuropharmacological mechanisms of nerve agent-induced  
539 seizure and neuropathology. *Neurosci Biobehav Rev.* 1997;21(5):559-579.  
540 <http://www.ncbi.nlm.nih.gov/pubmed/9353792>. Accessed September 2, 2019.
- 541 27. Yamasue H, Abe O, Kasai K, et al. Human brain structural change related to acute single  
542 exposure to sarin. *Ann Neurol.* 2007;61(1):37-46. doi:10.1002/ana.21024
- 543 28. Giyanwani PR, Zubair U, Salam O, Zubair Z. Respiratory Failure Following Organophosphate  
544 Poisoning: A Literature Review. 2017. doi:10.7759/cureus.1651
- 545 29. Carey JL, Dunn C, Gaspari RJ. Central respiratory failure during acute organophosphate  
546 poisoning. *Respir Physiol Neurobiol.* 2013;189(2):403-410. doi:10.1016/j.resp.2013.07.022
- 547 30. Szyndler J, Maciejak P, Turzyńska D, et al. Mapping of c-Fos expression in the rat brain  
548 during the evolution of pentylenetetrazol-kindled seizures. *Epilepsy Behav.*  
549 2009;16(2):216-224. doi:10.1016/j.yebeh.2009.07.030
- 550 31. Iryo Y, Matsuoka M, Igisu H. Suppression of pentylenetetrazol-induced seizures and c-fos  
551 expression in mouse brain by L-carnitine. *J Occup Health.* 2000;42(3):119-123.  
552 doi:10.1539/joh.42.119
- 553 32. Morgan JI, Cohen DR, Hempstead JL, Curran T. Mapping patterns of c-fos expression in the  
554 central nervous system after seizure. *Science (80- ).* 1987;237(4811):192-197.  
555 doi:10.1126/science.3037702
- 556 33. Clark M, Post RM, Weiss SR, Cain CJ, Nakajima T. Regional expression of c-fos mRNA in rat  
557 brain during the evolution of amygdala kindled seizures. *Brain Res Mol Brain Res.*  
558 1991;11(1):55-64. doi:10.1016/0169-328x(91)90021-o
- 559 34. Burazin TCD, Gundlach AL. Rapid and transient increases in cellular immediate early gene  
560 and neuropeptide mRNAs in cortical and limbic areas after amygdaloid kindling seizures in  
561 the rat. In: *Epilepsy Research.* Vol 26. ; 1996:281-293. doi:10.1016/S0920-1211(96)00060-



- 562 5
- 563 35. Liu J, Baraban SC. Network Properties Revealed during Multi-Scale Calcium Imaging of  
564 Seizure Activity in Zebrafish. *eNeuro*. 2019;6(1):ENEURO.0041-19.2019.  
565 doi:10.1523/ENEURO.0041-19.2019
- 566 36. Verrotti A, Milioni M, Zaccara G. Safety and efficacy of diazepam autoinjector for the  
567 management of epilepsy. *Expert Rev Neurother*. 2014;15(2):127-133.  
568 doi:10.1586/14737175.2015.1003043
- 569 37. Petras JM. NEUROLOGY AND NEUROPATHOLOGY OF SOMAN-INDUCED BRAIN INJURY: AN  
570 OVERVIEW. *J Exp Anal Behav*. 1994;61(2):319-329. doi:10.1901/jeab.1994.61-319
- 571 38. Shih T-M, Duniho SM, Mcdonough JH. Control of nerve agent-induced seizures is critical for  
572 neuroprotection and survival. 2003. doi:10.1016/S0041-008X(03)00019-X
- 573 39. Kaur P, Radotra B, Minz RW, Gill KD. Impaired mitochondrial energy metabolism and  
574 neuronal apoptotic cell death after chronic dichlorvos (OP) exposure in rat brain. 2007.  
575 doi:10.1016/j.jneuro.2007.08.001
- 576 40. Gunay N, Kose B, Demiryurek S, Ceylan NO, Sari I, Demiryurek AT. Protective effects of Y-  
577 27632 on acute dichlorvos poisoning in rats. *Am J Emerg Med*. 2010;28(3):268-274.  
578 doi:10.1016/j.ajem.2008.11.020
- 579 41. Lallement G, Carpentier P, Pernot-Marino I, Baubichon D, Collet A, Blanchet G. Involvement  
580 of the different rat hippocampal glutamatergic receptors in development of seizures  
581 induced by soman: an autoradiographic study. *Neurotoxicology*. 1991;12(4):655-664.  
582 <http://www.ncbi.nlm.nih.gov/pubmed/1665552>. Accessed November 20, 2019.
- 583 42. Lallement G, Carpentier P, Collet A, et al. Involvement of glutamatergic system of amygdala  
584 in generalized seizures induced by soman: comparison with the hippocampus. *C R Acad Sci*  
585 *III*. 1991;313(9):421-426. <http://www.ncbi.nlm.nih.gov/pubmed/1836748>. Accessed  
586 November 20, 2019.
- 587 43. Lallement G, Carpentier P, Collet A, Pernot-Marino I, Baubichon D, Blanchet G. Effects of  
588 soman-induced seizures on different extracellular amino acid levels and on glutamate  
589 uptake in rat hippocampus. *Brain Res*. 1991;563(1-2):234-240. doi:10.1016/0006-  
590 8993(91)91539-D
- 591 44. Dawson AH, Eddleston M, Senarathna L, et al. Acute human lethal toxicity of agricultural  
592 pesticides: A prospective cohort study. *PLoS Med*. 2010;7(10).  
593 doi:10.1371/journal.pmed.1000357
- 594 45. Bertolote JM, Fleischmann A, Eddleston M, Gunnell D. Deaths from pesticide poisoning: a

- 595 global response. *Br J Psychiatry*. 2006;189(3):201-203. doi:10.1192/bjp.bp.105.020834
- 596 46. McCarren HS, McDonough JH. Anticonvulsant discovery through animal models of status  
597 epilepticus induced by organophosphorus nerve agents and pesticides. *Ann N Y Acad Sci*.  
598 2016;1374(1):144-150. doi:10.1111/nyas.13092
- 599 47. Todorovic M, Cowan M, Balint C, Sun C, Kapur J. Characterization of status epilepticus  
600 induced by two organophosphates in rats. 2012. doi:10.1016/j.eplepsyres.2012.04.014
- 601 48. Dragunow M, Robertson HA. Kindling stimulation induces c-fos protein(s) in granule cells  
602 of the rat dentate gyrus. *Nature*. 1987;329(6138):441-442. doi:10.1038/329441a0
- 603 49. Le Gal G, Salle L. *Long-Lasting and Sequential Increase of c-Fos Oncoprotein Expression in*  
604 *Kainic Acid-Induced Status Epilepticus*. Vol 88.; 1988.
- 605 50. Simler S, Hirsch E, Danober L, Motte J, Vergnes M, Marescaux C. C-fos expression after  
606 single and kindled audiogenic seizures in Wistar rats. *Neurosci Lett*. 1994;175(1-2):58-62.  
607 doi:10.1016/0304-3940(94)91077-4
- 608 51. Trinka E, Cock H, Hesdorffer D, et al. A definition and classification of status epilepticus -  
609 Report of the ILAE Task Force on Classification of Status Epilepticus. *Epilepsia*.  
610 2015;56(10):1515-1523. doi:10.1111/epi.13121
- 611 52. Shih TM, McDonough JH. Neurochemical mechanisms in soman-induced seizures. *J Appl*  
612 *Toxicol*. 1997;17(4):255-264. doi:10.1002/(SICI)1099-1263(199707)17:4<255::AID-  
613 JAT441>3.0.CO;2-D
- 614 53. Tryphonas L, Clement JG. Histomorphogenesis of soman-induced  
615 encephalocardiomyopathy in Sprague- Dawley rats. *Toxicol Pathol*. 1995;23(3):393-409.  
616 doi:10.1177/019262339502300316
- 617 54. Okumura T, Takasu N, Ishimatsu S, et al. Report on 640 victims of the Tokyo subway sarin  
618 attack. *Ann Emerg Med*. 1996;28(2):129-135. doi:10.1016/S0196-0644(96)70052-5
- 619 55. Kaur S, Singh S, Chahal KS, Prakash A. Potential pharmacological strategies for the improved  
620 treatment of organophosphate-induced neurotoxicity. *Can J Physiol Pharmacol*.  
621 2014;92(11):893-911. doi:10.1139/cjpp-2014-0113
- 622 56. Solberg Y, Belkin M. The role of excitotoxicity in organophosphorous nerve agents central  
623 poisoning. *Trends Pharmacol Sci*. 1997;18(6):183-185. doi:10.1016/S0165-6147(97)89540-  
624 5
- 625
